# Supplementary material for: Diagnostic Accuracy of Computed Tomography in Predicting Primary Aldosteronism Subtype According to Age
Source: PubMed Central journal article supplement — Endocrinol Metab (Seoul). 2021 Mar 31;36(2):401–12. doi: 10.3803/EnM.2020.901 (PMC8090455; doi:10.3803/enm.2020.901), 2021-03-31
Supplement: enm-2020-901-suppl1.pdf [file enm-2020-901-suppl1.pdf]

## Supplemental Methods

### Definition of clinical and biochemical outcomes

Biochemical and clinical outcomes after unilateral adrenalectomy were assessed retrospectively in accordance with the standardized criteria of an international consensus, the Primary Aldosteronism Surgical Outcome (PASO) consensus [31]. Details of the outcome criteria have been described previously by Williams et al. [31]. In brief, the biochemical outcome was determined by the serum potassium concentration, postoperative aldosterone-to-renin ratio, change in plasma aldosterone concentration; clinical outcome was determined by postoperative blood pressure and change of defined daily dose in antihypertensive medication. Biochemical and clinical outcomes were classified as complete, partial, or absent success based on the response to surgery.
