# Supplementary material for: Diagnostic Accuracy of Computed Tomography in Predicting Primary Aldosteronism Subtype According to Age
Source: PubMed Central journal article supplement — Endocrinol Metab (Seoul). 2021 Mar 31;36(2):401–12. doi: 10.3803/EnM.2020.901 (PMC8090455; doi:10.3803/enm.2020.901), 2021-03-31
Supplement: enm-2020-901-suppl4.pdf [file enm-2020-901-suppl4.pdf]

**Supplemental Table S3.** Clinical Characteristics in 2 PA Patients Aged <35 Years with Discordance between CT and AVS in Those with Marked PA (e.g., Hypokalemia and PAC > 15.9 ng/dL) and Unilateral Lesion on CT

| Case | Age, yr | Sex   | BMI, kg/m <sup>2</sup> | eGFR, mL/min/1.73 m <sup>2</sup> | Serum potassium, mEq/L | PAC, ng/dL | PRA, ng/mL/hr | ARR, ng/dL per ng/mL/hr | Nodule size, cm | LI  | CL suppression (CLR) |
|------|---------|-------|------------------------|----------------------------------|------------------------|------------|---------------|-------------------------|-----------------|-----|----------------------|
| 1    | 29      | Women | 18.8                   | 118.2                            | 2.7                    | 179.00     | 0.40          | 447.50                  | 1.4             | 2.0 | Yes (0.42)           |
| 2    | 31      | Men   | 28.4                   | 47.8                             | 3.0                    | 49.60      | 0.40          | 124.00                  | 1.6             | 1.3 | Yes (0.22)           |

PA, primary aldosteronism; CT, computed tomography; AVS, adrenal vein sampling; PAC, plasma aldosterone concentration; BMI, body mass index; eGFR, estimated glomerular filtration rate; PRA, plasma renin activity; ARR, aldosterone-to-renin ratio; LI, lateralization index; CL, contralateral; CLR, contralateral ratio.
